# Supplementary material
Source: Springer Nature journal article supplement (https://www.springermedizin.de/resource/supplementary/13098_2014_315_MOESM1_ESM.pdf/9671058)

Number of significant coronary lesions (stenosis > 50%)

6  
5  
4  
3  
2  
1  
0

1st (<6.8%)

2nd (6.8-8.2%)

3rd (>8.2%)

HbA1c tertiles

$p=0.011$  (for trend)

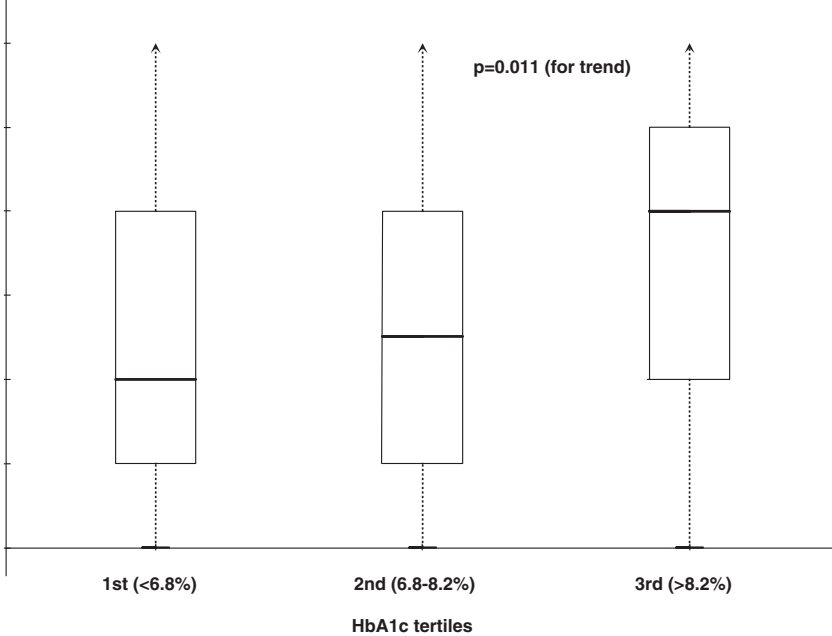

Supplement: MOESM1 [file 9671058]
